# Supplementary material for: Impact of isotype on the mechanism of action of agonist anti-OX40 antibodies in cancer: implications for therapeutic combinations
Source: PubMed Central journal article supplement — J Immunother Cancer. 2024 Jul 4;12(7):e008677. doi: 10.1136/jitc-2023-008677 (PMC11227834; doi:10.1136/jitc-2023-008677), 2024-07-04
Supplement: jitc-2023-008677supp002.pdf [file jitc-2023-008677supp002.pdf]

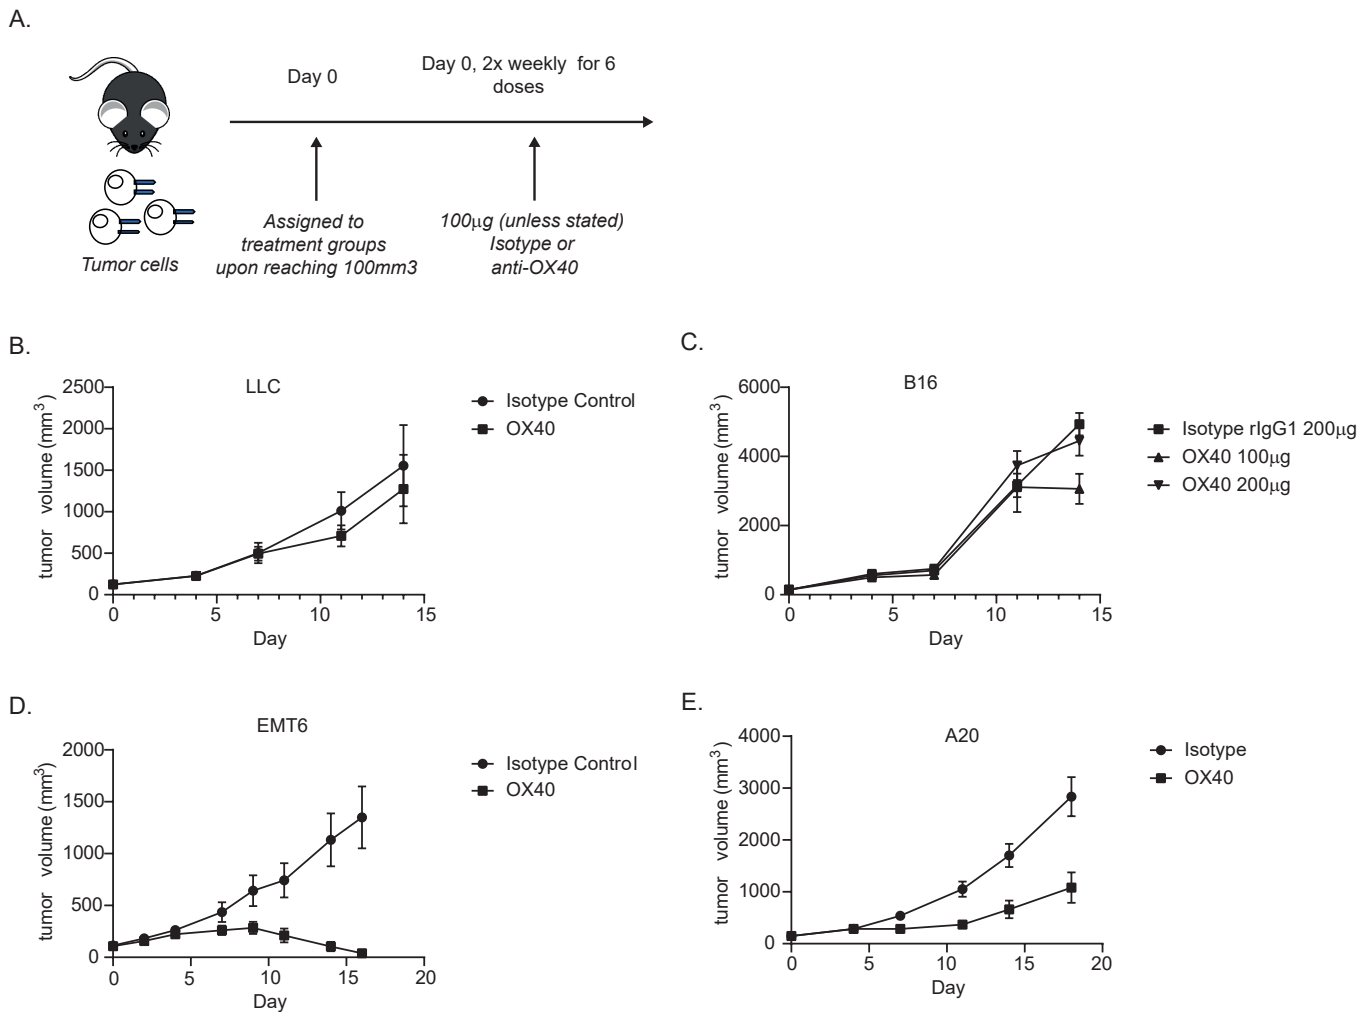

Supplemental Fig 1. A. Schematic for experiments shown in B-F. Mice were challenged with tumour cells, assigned to treatment groups upon reaching 100mm<sup>3</sup> and treated with either isotype control or anti-OX40 mAb. B. Growth curves for mice challenged with LLC (1x10<sup>5</sup> cells) and treated with 100 µg n= 7, one experiment. C. Growth curves of mice challenged with B16F10 (2.5x10<sup>4</sup> cells) and treated with either 100 µg or 200 µg anti-OX40 mAb. n=6 for Isotype rIgG1 and n=7 for both anti-OX40 mAb groups, one experiment. D. Growth curves of EMT6 (1x10<sup>5</sup>) and treated with 100 µg anti-OX40 mAb or isotype control. n=10 one experiment. E. Growth curves of mice challenged with A20 (1x10<sup>6</sup>) and treated with 100 µg anti-OX40 mAb. n=25 isotype control and n=26 anti-OX40 one experiment.

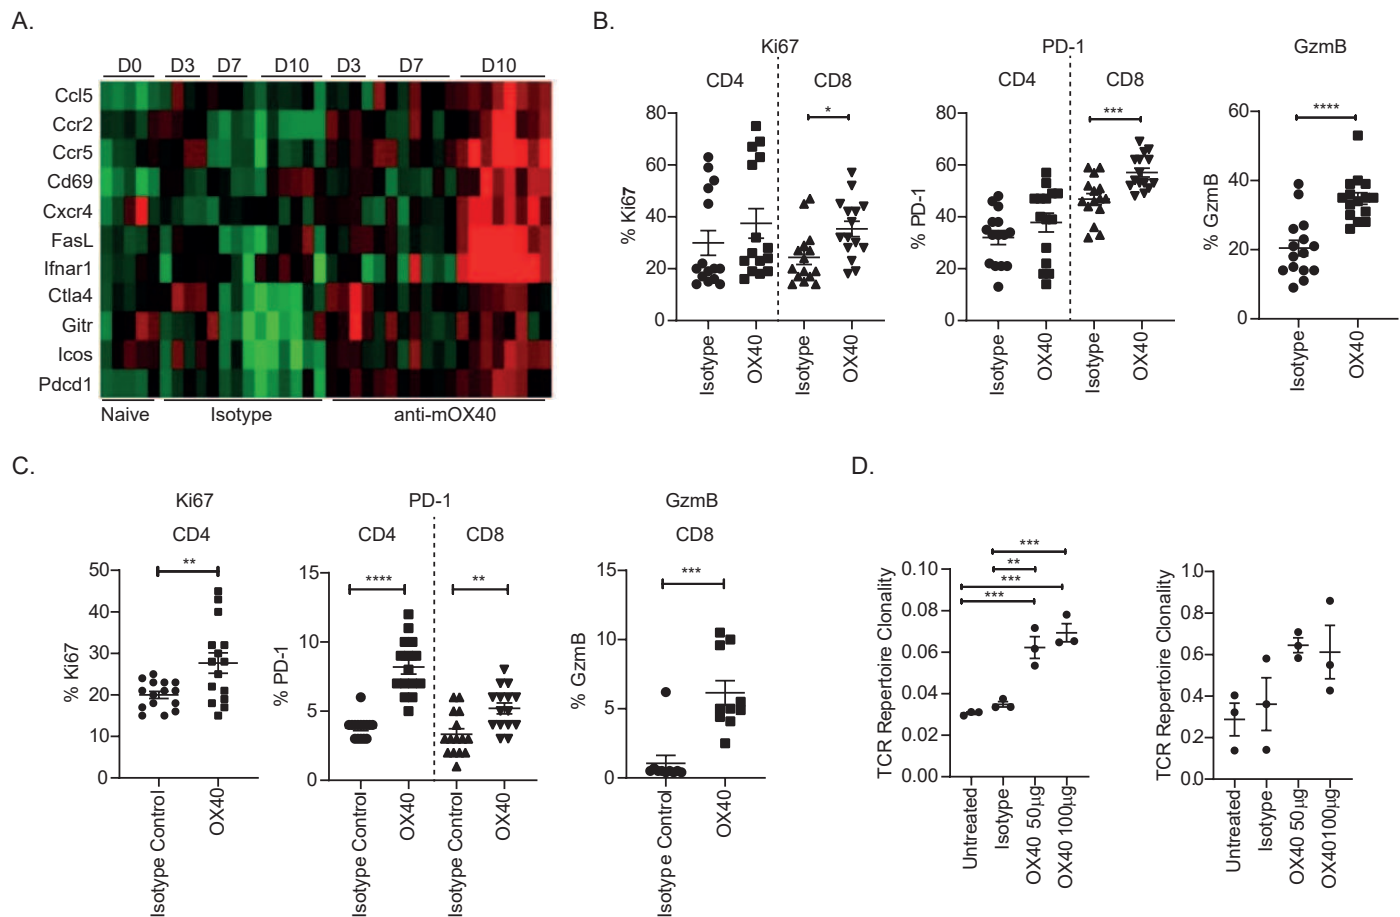

Supplemental Fig. 2. A. Gene expression analysis of CD8+ T cells isolated from A20 tumor bearing mice treated with 100 µg isotype control or anti-OX40 twice weekly. Mice treated as in schematic shown in Supplemental Fig. 1A. Tumor infiltrate (B) and Blood (C) taken from A20 tumor bearing mice on Day 10 post randomisation and treated with isotype control or anti-OX40 (200 µg) and analysed for Ki67 (left panel), PD-1 (middle panel) and GzmB (right panel). B. n = 15, pooled from 3 independent experiments. C. n = 15 for Ki67 and PD-1, pooled from 3 independent experiments, n = 10 for GzmB, pooled from 2 independent experiments. D. Mice were challenged with  $5 \times 10^4$  CT26 tumor cells and treated with indicated doses of anti-OX40. Spleens (left panel) and tumor (right panel) were harvested 7 days post assignment to treatment groups and assessed for TCR repertoire clonality n=3, one experiment. \*\*\*\* p<0.0001, \*\*\* p<0.001, \*\* p<0.01, \* p<0.05 Mean +/- sem B & C – unpaired T-Test, D - Tukey's multiple comparison one way anova

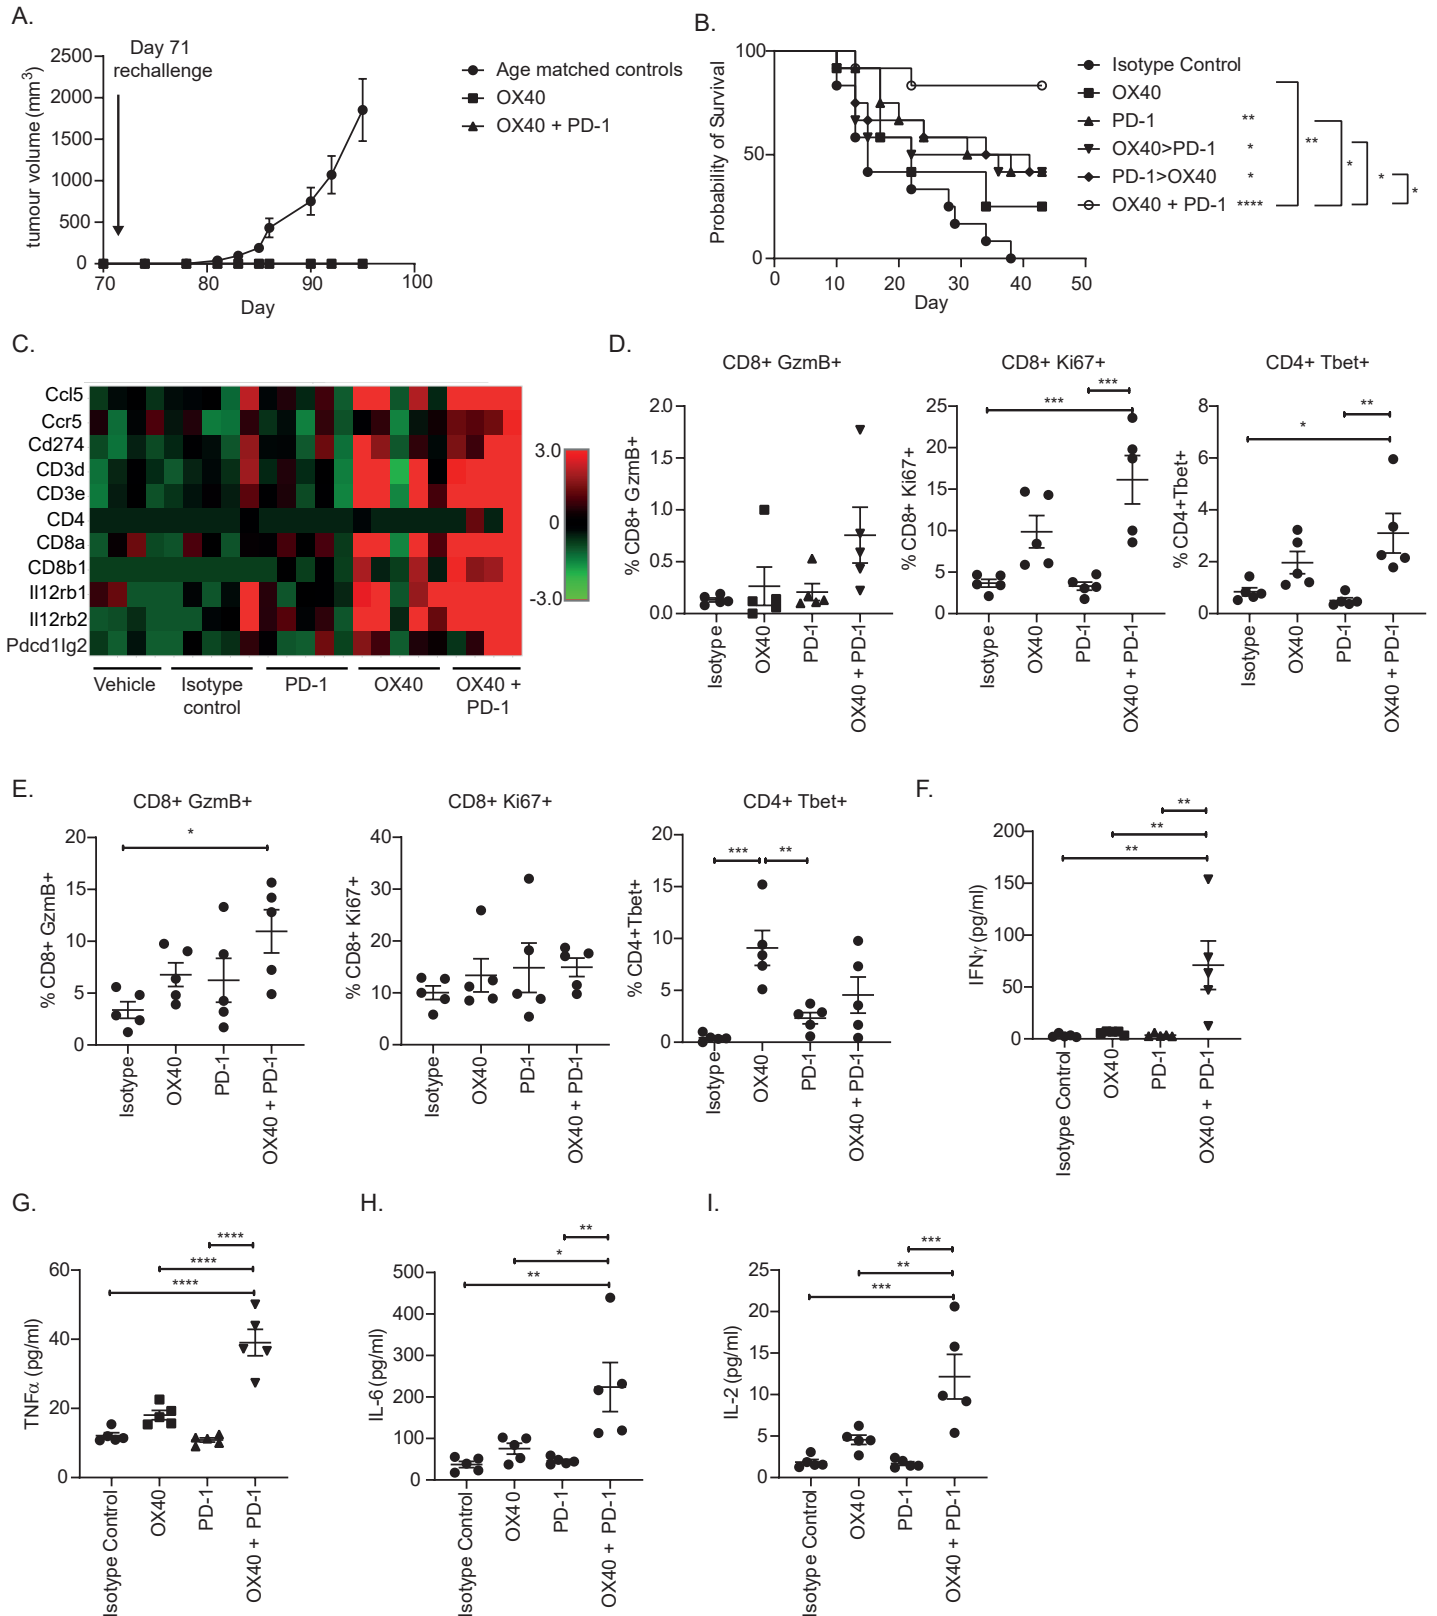

Supplemental Fig 3. Combination treatment with anti-OX40 and anti-PD-1 leads to increase in Th1 cytokines in CT26 tumor model A. Growth curves of naive mice or long term survivors from set up as in Fig 1F. Mice challenged with CT26 cells ( $5 \times 10^4$ ) on Day 71  $n=10$  age matched controls,  $n=2$  anti-OX40 mAb monotherapy and  $n=14$  anti-OX40 + anti-PD-1 mAb, one experiment. B. Survival curves of mice challenged with CT26 ( $5 \times 10^4$ ) and treated with 6 doses of Isotype combination (rlgG1 100  $\mu$ g + rlgG2a 200  $\mu$ g), anti-OX40 mAb (100  $\mu$ g), anti-PD-1 mAb (200  $\mu$ g) or combination given concurrently (anti-OX40 + anti-PD-1) or sequentially either as anti-OX40 mAb first (anti-OX40>anti-PD-1 mAb) or anti-PD-1 mAb first (anti-PD-1>anti-OX40 mAb)  $n=12$ , one experiment. C. Gene expression analysis of TILs harvested on Day 7  $n= 4$  for vehicle and anti-OX40 + anti-PD-1 mAb,  $n=5$  for isotype, anti-OX40 mAb and anti-PD-1 mAb monotherapies. D & E. Blood (D) and tumour (E) samples taken on Day 10 immunophenotyped for CD8+GzmB+ (left panels), CD8+Ki67+ (middle panels) and CD4+Tbet+ (right panels).  $n=5$ , one experiment. F-I. Serum from mice challenged as in Fig. 1F were analysed for IFN $\gamma$  (F), TNF $\alpha$  (G), IL-6 (H) and IL-2 (I).  $n=5$  one experiment. \*\*\*\*  $p<0.0001$ , \*\*\*  $p<0.001$ , \*\*  $p<0.01$ , \*  $p<0.05$  Mean  $\pm$  sem B - Log rank test, D-I Tukeys one-way annova with multiple comparison.

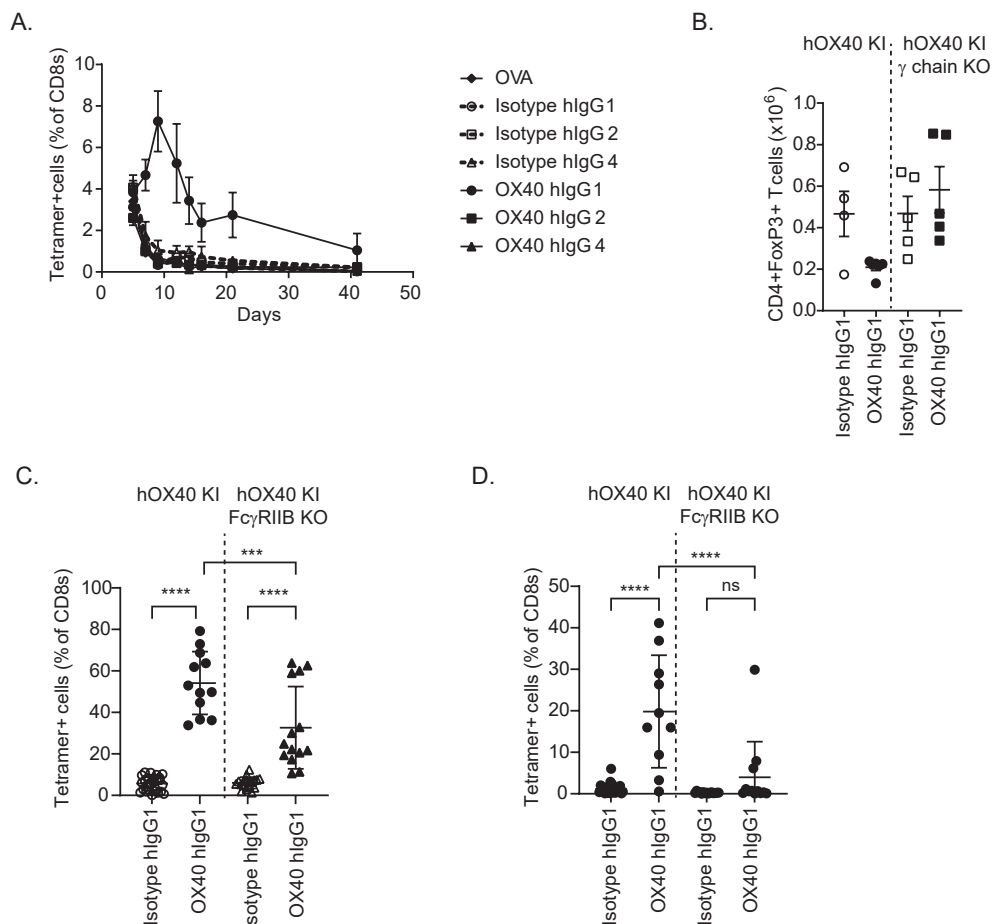

Supplemental Fig 4. anti-OX40 hlgG1 expands OT-I T cells in WT recipients. A.  $1 \times 10^5$  hOX40KI<sup>+/-</sup> OT-I were transferred into WT C57BL/6 recipients and challenged with 5 mg Ova + 100  $\mu$ g isotype or anti-OX40 mAb. Blood samples were analysed on the indicated days, n=3 representative of 2 independent experiments. B. Splenic analysis of CD4+Foxp3+ T cell numbers on Day 4 post Ova (5 mg) and antibody (100  $\mu$ g) challenge. Isotype hlgG1 mAb n=4, anti-OX40 hlgG1 mAb n=6,  $\gamma$  chain KO Isotype hlgG1 mAb and anti-OX40 hlgG1 mAb n=5 representative of 2 independent experiments. C. Blood analysis of OT-I T cells on Day 7, Isotype hlgG1 mAb n=16, anti-OX40 hlgG1 mAb n=12 (4 mice excluded due to lack of response), Fc $\gamma$ RIIB KO Isotype hlgG1 mAb n=19, Fc $\gamma$ RIIB KO anti-OX40 hlgG1 mAb n= 15 (4 mice excluded due to lack of response). Data pooled from 4 independent experiments. D. Blood analysis of OT-I T cells on Day 61, Isotype hlgG1 mAb n=12, anti-OX40 hlgG1 mAb n=10 (2 mice excluded due to a lack of response), Fc $\gamma$ RIIB KO Isotype hlgG1 mAb n=15 and anti-OX40 hlgG1 mAb n= 13 (2 mice excluded due to lack of response). Data pooled from 3 independent experiments. \*\*\*\* p<0.0001, \*\*\* p<0.01, Mean +/- sem C & D – Tukey's multiple comparison one way ANOVA

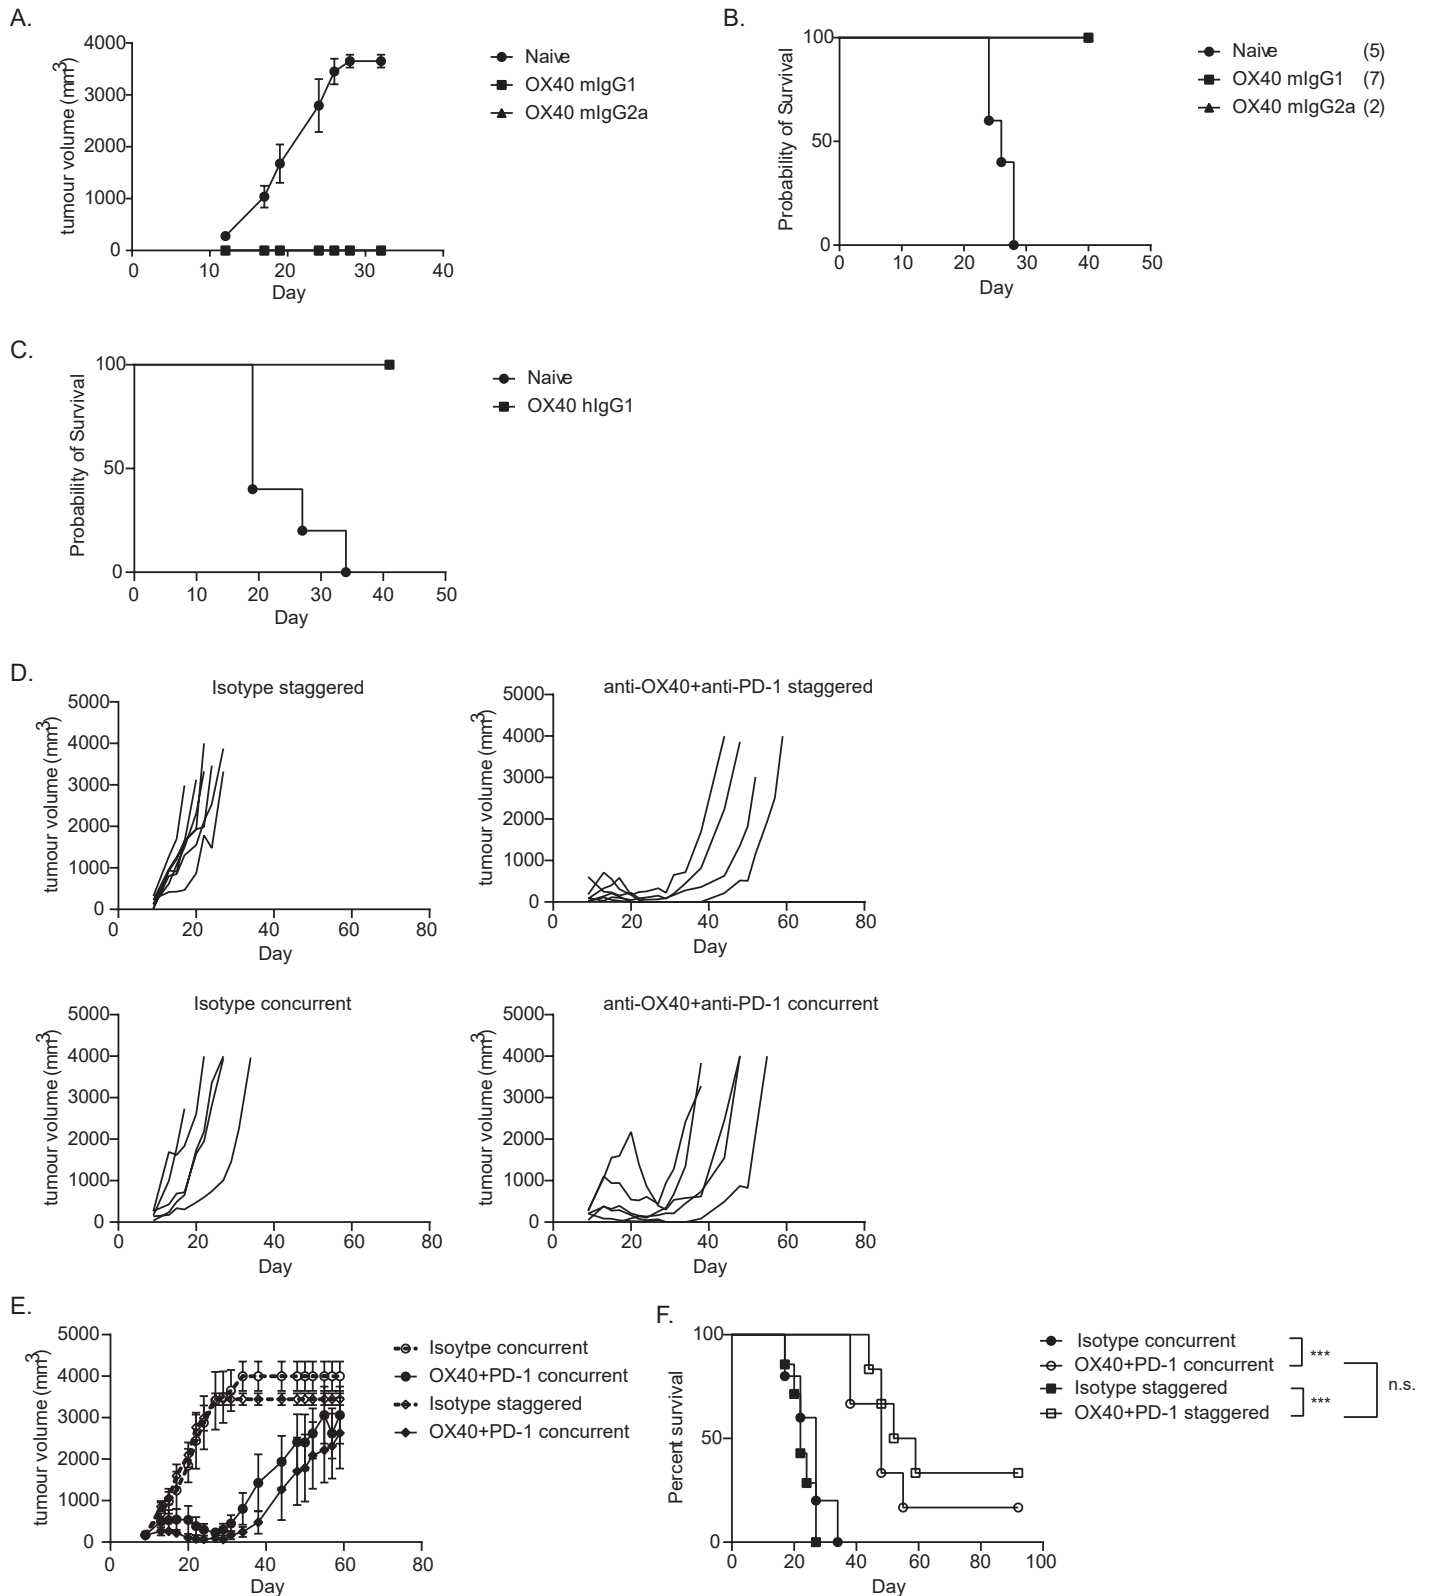

Supplemental Fig 5. Anti-OX40 mAb induces protective memory and is augmented with staggered or concurrent treatment with anti-PD-1 mAb. EG.7 Ova rechallenge experiments with mice previously challenged with EG.7 Ova and treated with anti-OX40 mlgG1 and mlgG2a (A & B) and anti-OX40 hlgG1 (C). Mice were re-challenged with  $0.5 \times 10^6$  EG.7 Ova, as were Naive mice to act as controls. Naive mice,  $n=5$ , mlgG1  $n=7$  (A & B), mlgG2a  $n=2$  (A & B), hlgG1  $n=2$ . D-F Mice challenged with  $0.5 \times 10^6$  EG.7 Ova were treated with anti-OX40 hlgG1 and anti-PD-1 mAb either concurrently or with a staggered dosing schedule. Individual growth curves are shown in (D), combined growth curves in (E) and Survival curves are shown in (F). Isotype concurrent  $n=5$ , Isotype staggered  $n=7$ , OX40+PD1 concurrent  $n=6$  and OX40+PD-1 staggered  $n=6$  \*\*\*  $p < 0.001$ , F - Log rank test.

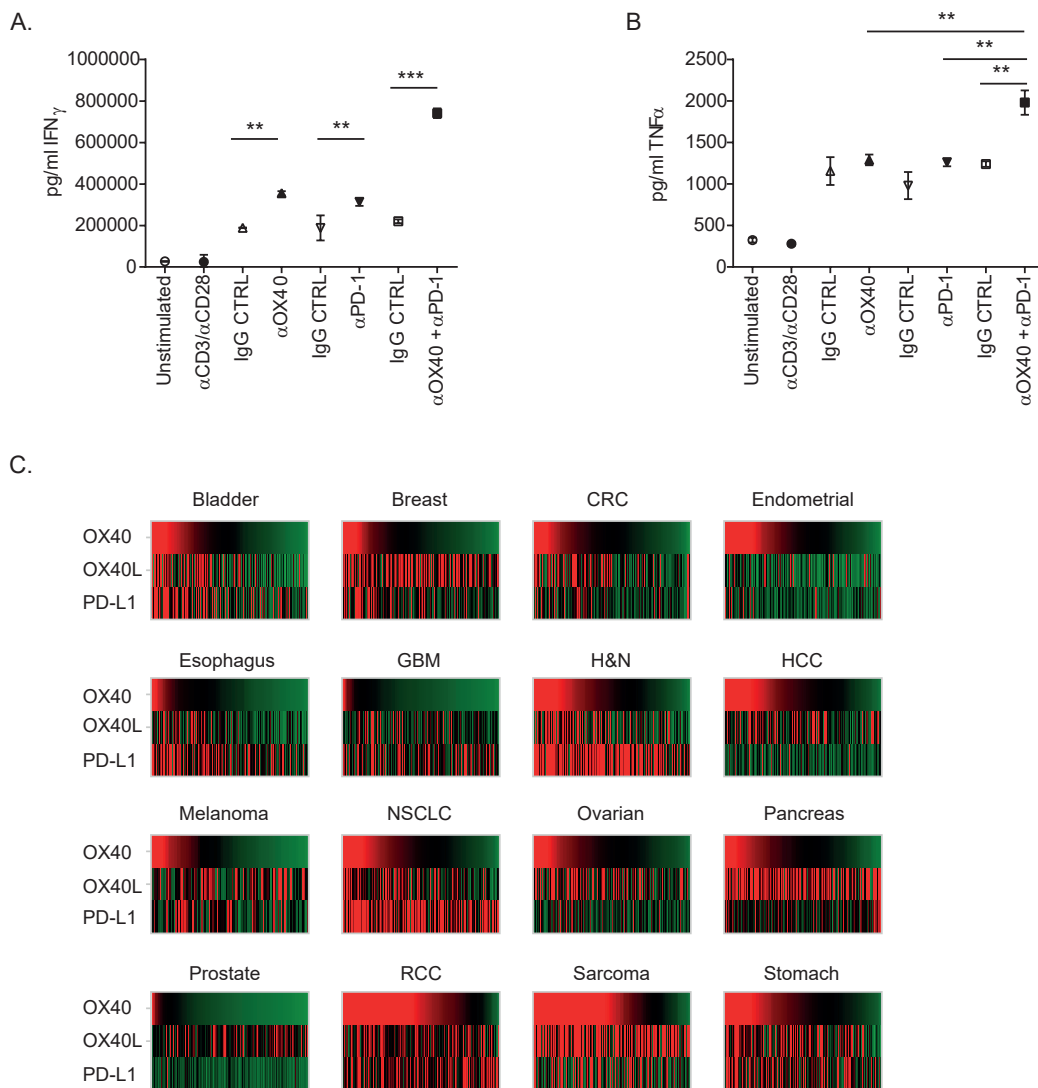

Supplemental Fig 6. OX40 and PD-1 boost Th1 cytokines in PBMCs from healthy donors. A & B. Treatment of healthy hPBMCs cultured in presence of anti-CD3/anti-CD28 expander beads (1:20 ratio) for 48 hours, then restimulated with anti-OX40, pembrolizumab or both (10 $\mu$ g/ml) in the presence of anti-CD3 beads at a 1:1 ratio for a further 4 days. Supernatants tested for IFN $\gamma$  (A) and TNF $\alpha$  (B). Representative data shown from one of 5 donors. C. OX40, OX40L and PD-L1 abundance in various tumours (stage IV) using RNA-Seq data from TCGA. Expression is based on reads per Kb per million (RPKM). Mean  $\pm$  S.E.M. \*\*\*  $p < 0.0003$ , \*\*  $p < 0.005$  A & B - Unpaired t test.
